# Supplementary material
Source: publisher figshare collection journal article supplement (https://acs.figshare.com/ndownloader/files/14773322)
Supplement: Supplementary file 1 [file 14773322]

## Supporting information

# In situ Investigation of Water Interaction with Lead-Free All Inorganic Perovskite ( $\text{Cs}_2\text{SnI}_x\text{Cl}_{6-x}$ )

Weiguang Zhu<sup>†</sup>, Tiankai Yao<sup>†</sup>, Junhua Shen<sup>‡</sup>, Wenqian Xu<sup>§</sup>, Bowen Gong<sup>†</sup>, Yachun Wang<sup>†</sup>, Jie Lian<sup>†,\*</sup>

<sup>†</sup>Department of Mechanical, Aerospace and Nuclear Engineering and <sup>‡</sup>Department of Materials Science and Engineering, Rensselaer Polytechnic Institute, Troy, New York 12180, United States

<sup>§</sup>X-ray Science Division, Advanced Photon Source, Argonne National Laboratory, Lemont, Illinois 60439, United States

## AUTHOR INFORMATION

### Corresponding Author

\*Email: [lianj@rpi.edu](mailto:lianj@rpi.edu)

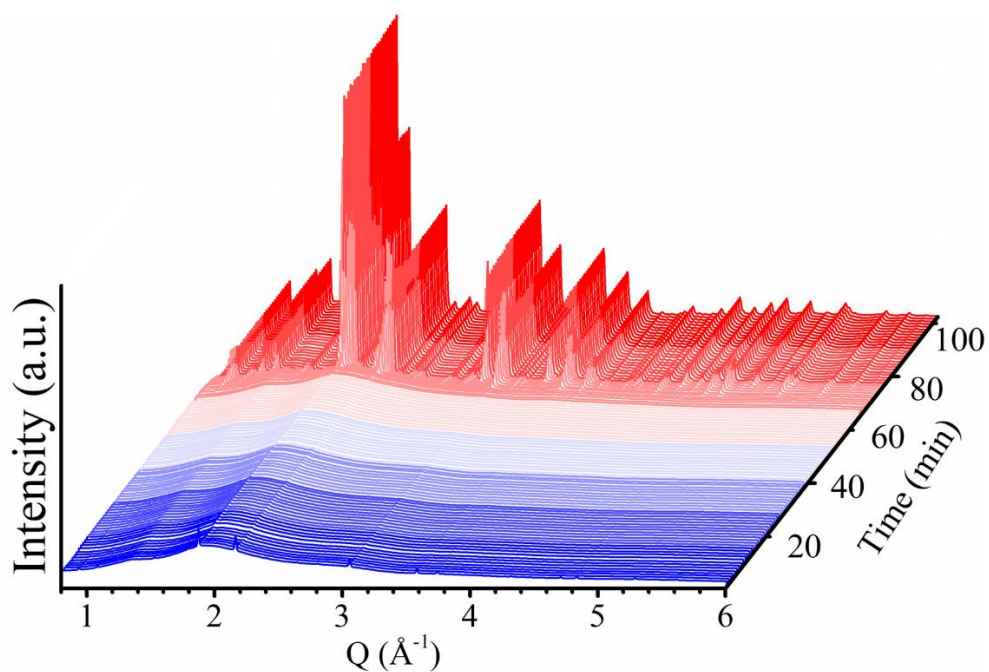

**Figure S1.** Series of diffraction patterns of  $\text{Cs}_2\text{SnI}_6$  recorded during in situ experiment with water addition at room temperature.

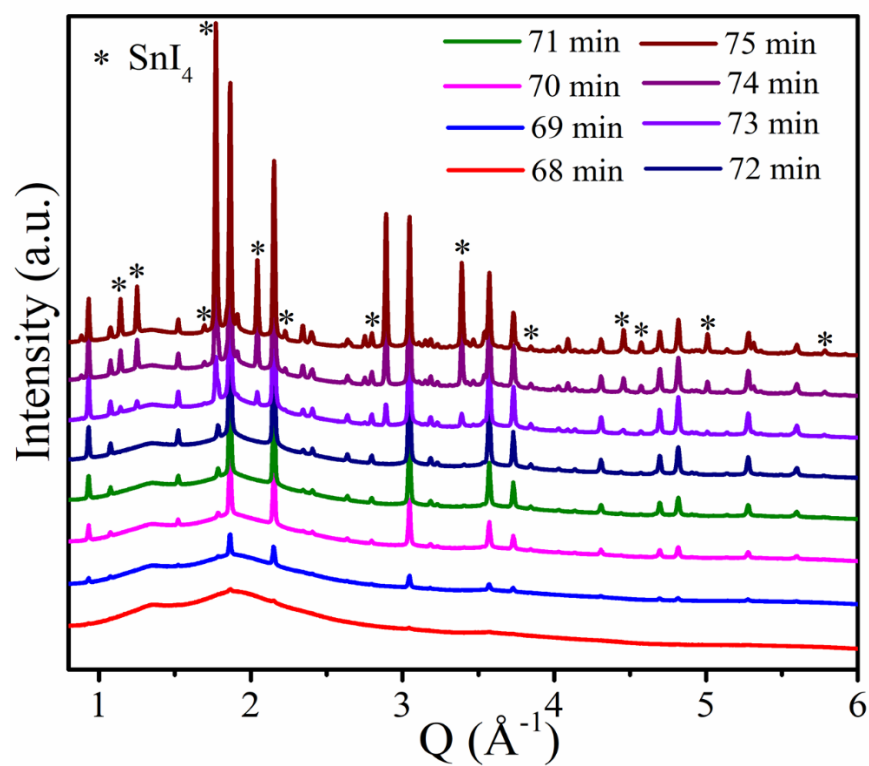

**Figure S2.** In situ synchrotron diffraction patterns of  $\text{Cs}_2\text{SnI}_6$  collected during the dehydration process.

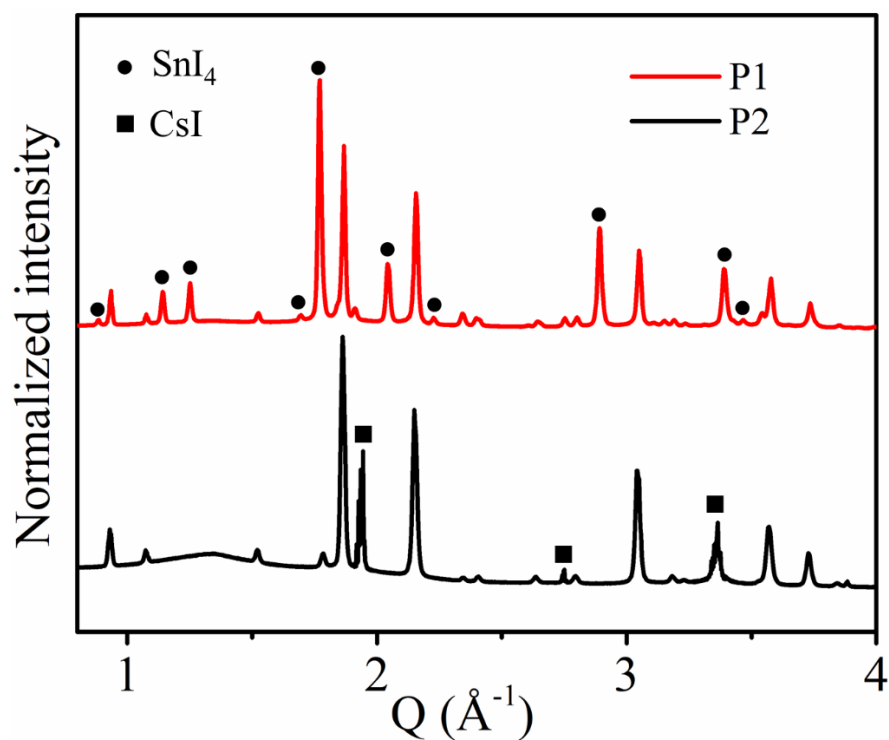

**Figure S3.** Synchrotron X-ray powder diffraction patterns of the dehydrated  $\text{Cs}_2\text{SnI}_6$  sample obtained at various locations. CsI and  $\text{SnI}_4$  can be identified, respectively.

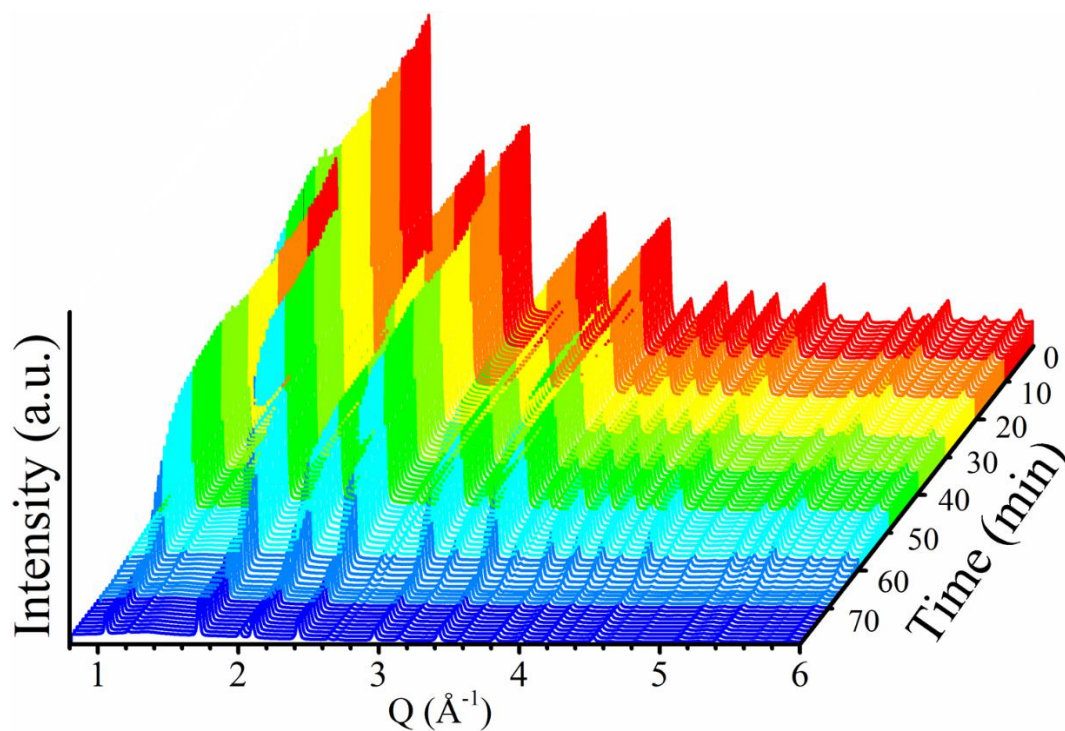

**Figure S4.** In situ synchrotron X-ray diffraction patterns of  $\text{Cs}_2\text{SnCl}_6$  upon water addition.

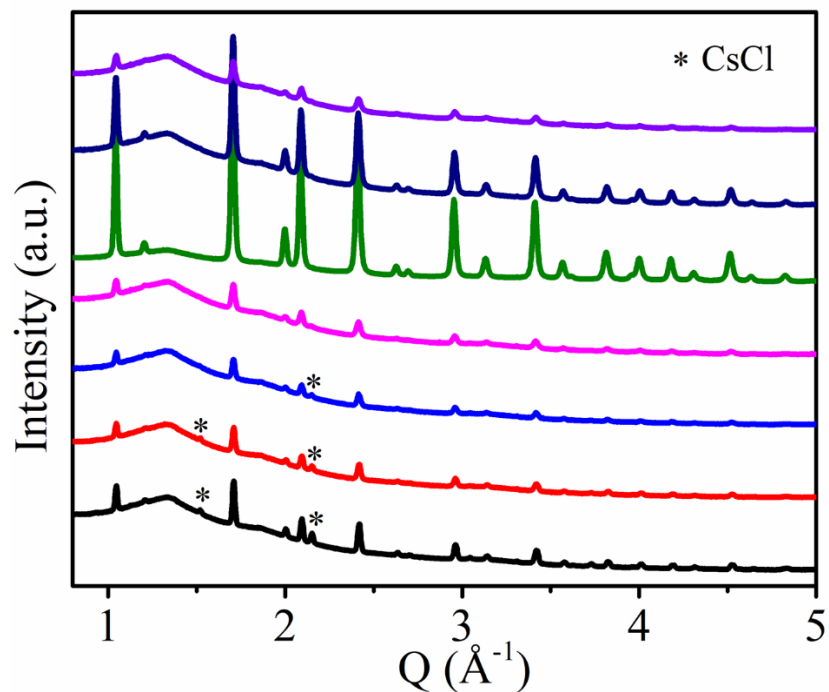

**Figure S5.** X-ray diffraction patterns mapping of the dried  $\text{Cs}_2\text{SnCl}_6$  sample. From top to bottom the scans were taken at 1 mm interval along the tubing direction.

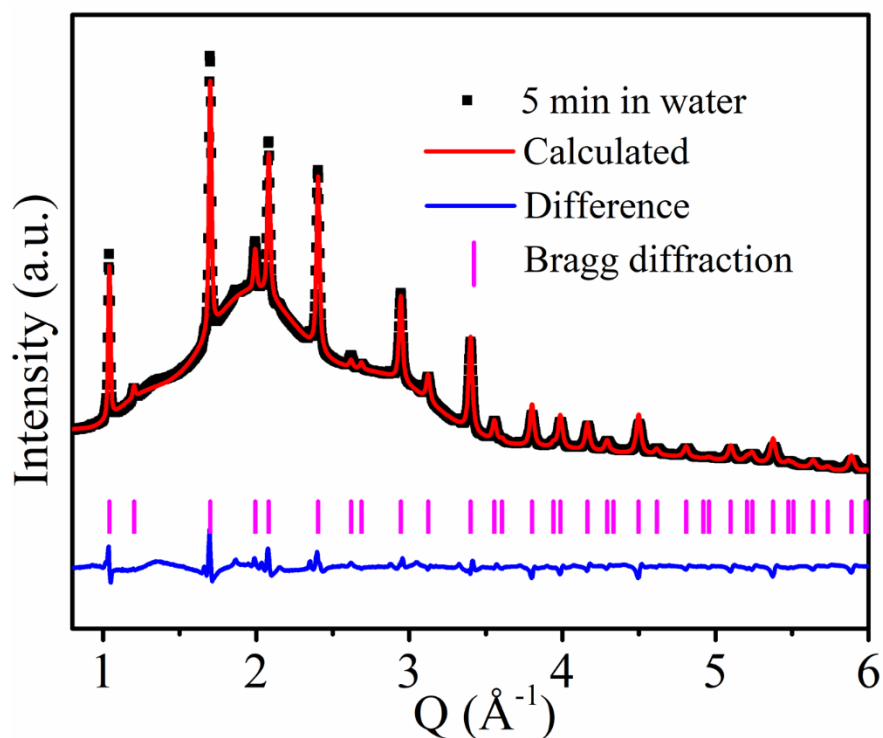

**Figure S6.** Rietveld refined X-ray diffraction pattern of  $\text{Cs}_2\text{SnI}_{0.9}\text{Cl}_{5.1}$  in water for 5 mins. The composition changes to  $\text{Cs}_2\text{SnI}_{0.12}\text{Cl}_{5.88}$ . Black squares are the observed data, the red lines are the fittings, and the blue lines represent difference, and the corresponding Bragg diffractions are the purple sticks.

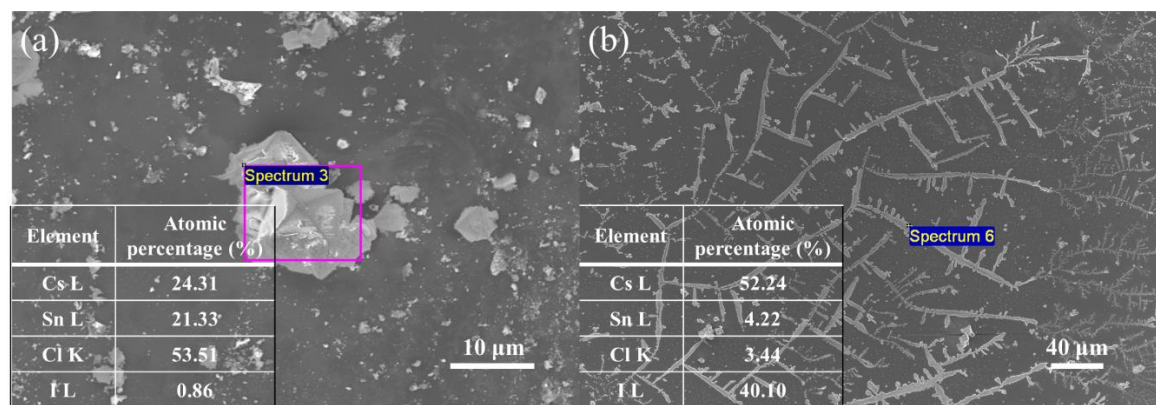

**Figure S7.** EDX atomic percentages of all elements on (a) hexagonal crystals, and (b) dendrites from the post in situ Raman test.
